# Supplementary material
Source: PubMed Central journal article supplement (PMC2694974)
Supplement: mmc1.pdf [file mmc1.pdf]

**Supplemental Data**

**Mutations in a BTB-Kelch Protein, KLHL7,**

**Cause Autosomal-Dominant Retinitis Pigmentosa**

**James S. Friedman, Joseph W. Ray, Naushin Waseem, Kory Johnson, Matthew J. Brooks, Therése Hugosson, Debra Breuer, Kari E. Branham, Daniel S. Krauth, Sara J. Bowne, Lori S. Sullivan, Vesna Ponjavic, Lotta Gränse, Ritu Khanna, Edward H. Trager, Linn M. Gieser, Dianna Hughbanks-Wheaton, Radu I. Cojocaru, Noor M. Ghiasvand, Christina F. Chakarova, Magnus Abrahamson, Harald H.H. Göring, Andrew R. Webster, David G. Birch, Goncalo R. Abecasis, Yang Fann, Shomi S. Bhattacharya, Stephen P. Daiger, John R. Heckenlively, Sten Andréasson, and Anand Swaroop**

Figure S1. Whole Genomic Scan of adRP Family 72

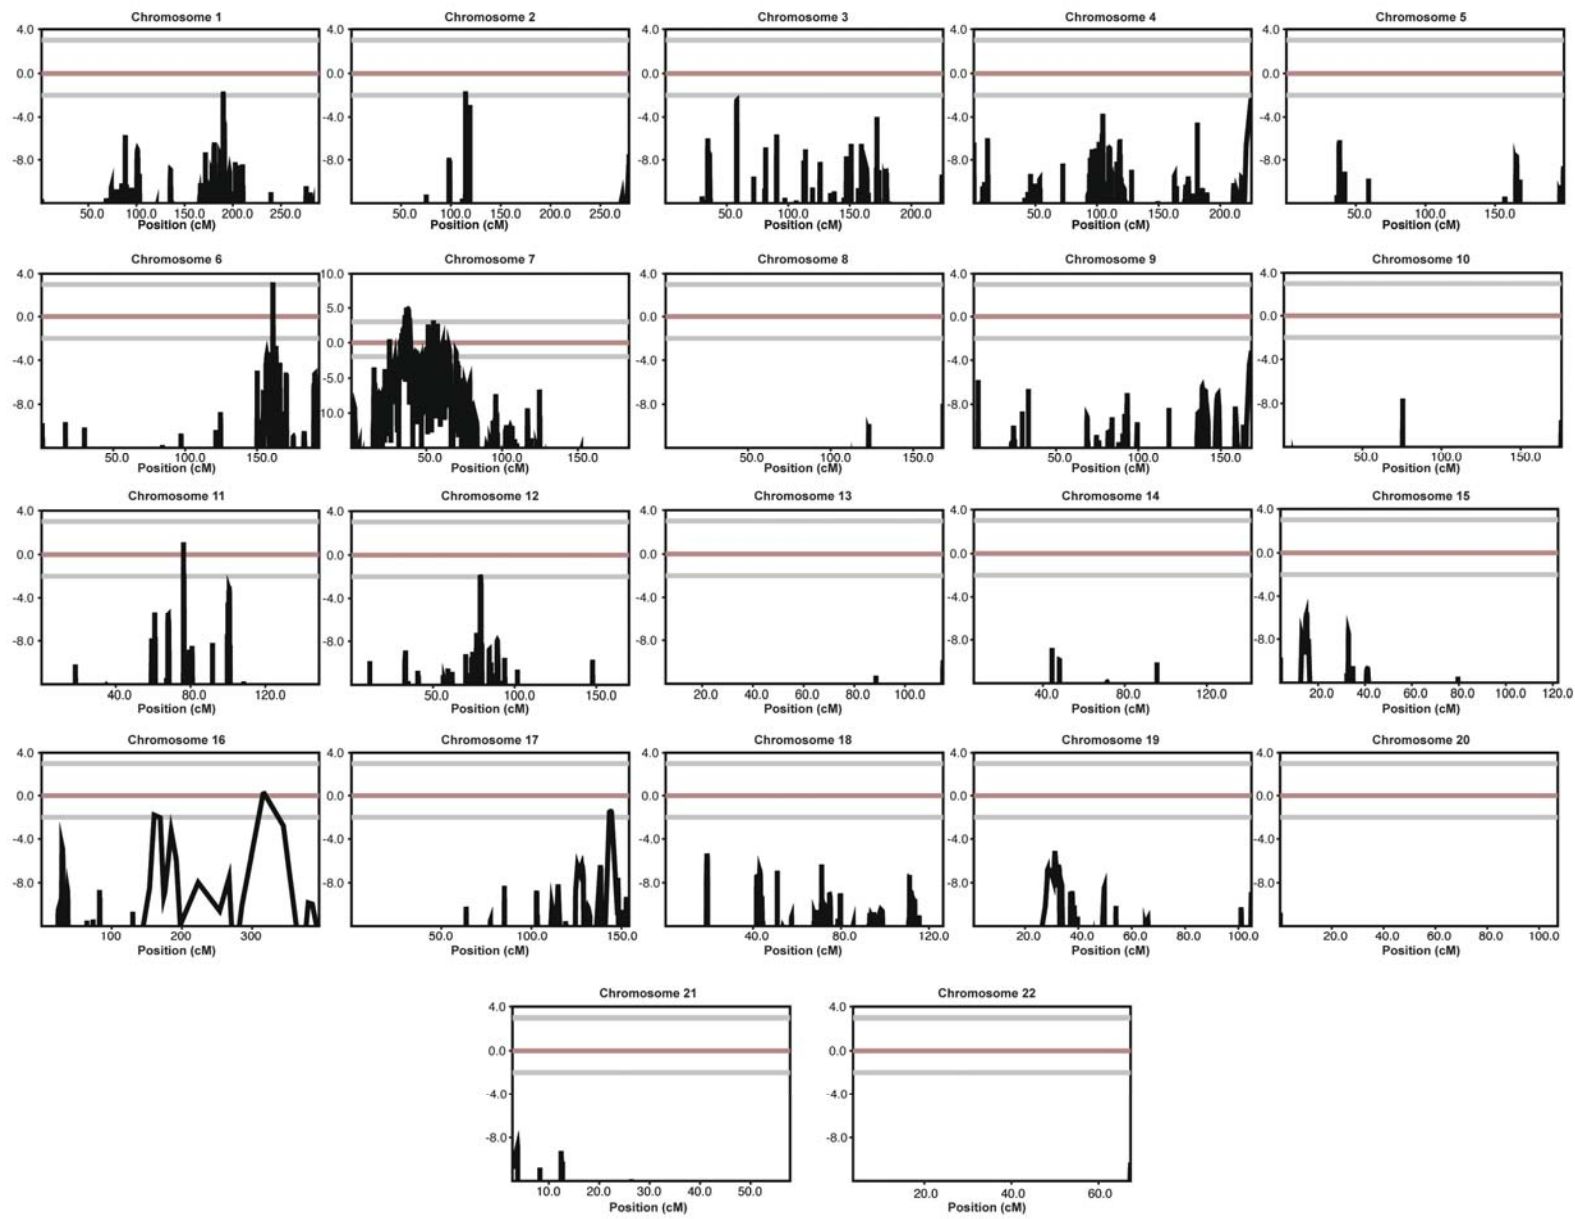

**Table S1. Primers Used to Screen *KLHL7* Gene**

| Exon | Forward Primer                            | Reverse Primer                             |
|------|-------------------------------------------|--------------------------------------------|
| 1    | KLHL7_ex1F 5'-gcagtctcattgctcggaac-3'     | KLHL7_ex1R 5'-ggcgaggacagagaaagg-3'        |
| 2    | KLHL7_ex2F 5'-gcctttgcatttattattgcttt-3'  | KLHL7_ex2R 5'-gtcaactgccccacgttcta-3'      |
| 3    | KLHL7_ex3F 5'-gcattggcaagcaccttt-3'       | KLHL7_ex3R 5'-tggccttaagttcttaactgcttt-3'  |
| 4    | KLHL7_ex4F 5'-ccgtggctcctcagtcaaac-3'     | KLHL7_ex4R 5'-caatgctttgcatggttagata-3'    |
| 5    | KLHL7_ex5F 5'-ggggctattaggatacattcca-3'   | KLHL7_ex5R 5'-gcgataacttaaatcagccttt-3'    |
| 6    | KLHL7_ex6F 5'-gaagtcacgcttcattggaatg-3'   | KLHL7_ex6R 5'-tccttgatggtgcca-3'           |
| 7    | KLHL7_ex7F 5'-gaagaaccagcaagtgccag-3'     | KLHL7_ex7R 5'-aaagggtttaagcccatga-3'       |
| 8    | KLHL7_ex8F 5'-aaggccctattatgtctgggta-3'   | KLHL7_ex8R 5'-tcatacatatgtgaaagaacacca-3'  |
| 9    | KLHL7_ex9F 5'-ttgtaatatgtctcaagccaaaca-3' | KLHL7_ex9R 5'-ttaccaagaaagtatctggacaaa-3'  |
| 10   | KLHL7_ex10F 5'-ggccgatgaccctaaattc-3'     | KLHL7_ex10R 5'-tgttgggtcctctggtctt-3'      |
| 11   | KLHL7_ex11F 5'-ttaccataatcattgtcaacttt-3' | KLHL7_ex11R 5'-tcaagtatgtaattcccagaaact-3' |
| 12   | KLHL7_ex12F 5'-tggtggctatgtggacattc-3'    | KLHL7_ex12R 5'-cctcatttcaactgaaactttttt-3' |

**Table S2. *Klhl7* and *Hprt* RT-PCR Primers**

| Gene         | Forward Primer                        | Reverse Primer                        |
|--------------|---------------------------------------|---------------------------------------|
| <i>Klhl7</i> | Klhl7_rt-f 5'- atctctcagccaggacacc-3' | Klhl7-rt-r 5' acggcagcgtcataaacct-3'  |
| <i>Hprt</i>  | Hprt_rt-f 5'- caaactttgctttccctggt-3' | Hprt_rt-r 5'- caaggcatatccaaacaaca-3' |
